# Supplementary material for: Long-lasting phosphorescence with a tunable color in a Mn2+-doped anionic metal–organic framework
Source: Royal Society of Chemistry journal article supplement (doi:10.1039/c7tc02493b), 2017-01-01
Supplement: c7tc02493b1.pdf [file c7tc02493b1.pdf]

*Supplementary Information (SI) for*

**Color Tunable Long-Lasting Phosphorescence in Mn<sup>2+</sup>-Doped  
Anionic Metal-Organic Framework**

**Xiaogang Yang,<sup>a</sup> and Dongpeng Yan<sup>\*ab</sup>**

<sup>a</sup> *Beijing Key Laboratory of Energy Conversion and Storage Materials, College of Chemistry, Beijing Normal University, Beijing 100875, P. R. China. \*E-mail: yandp@bnu.edu.cn; yandongpeng001@163.com.*

<sup>b</sup> *State Key Laboratory of Chemical Resource Engineering, Beijing University of Chemical Technology, Beijing 100029, (P. R. China).*

## Supporting Figures

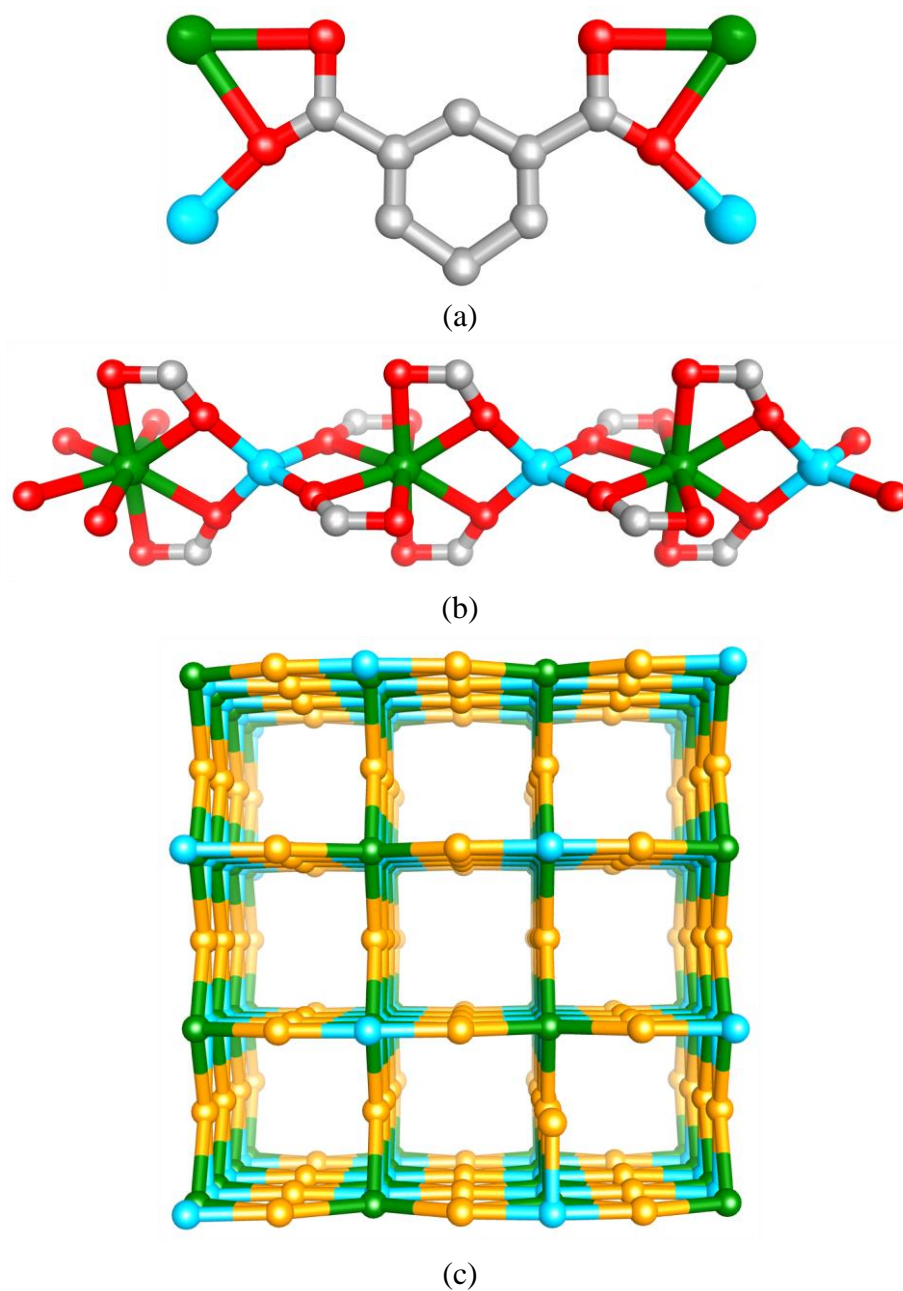

**Figure S1.** (a) The binding fashion of IPA ligand. (b) Ball-and-stick view of the 1D heterometallic polymeric chain running along *c* axis. (c) Schematic representation of the 3D network of AMOF-1. All hydrogen atoms are omitted for clarity. (O: red; C: gray; Cd: green; Li: cyan).

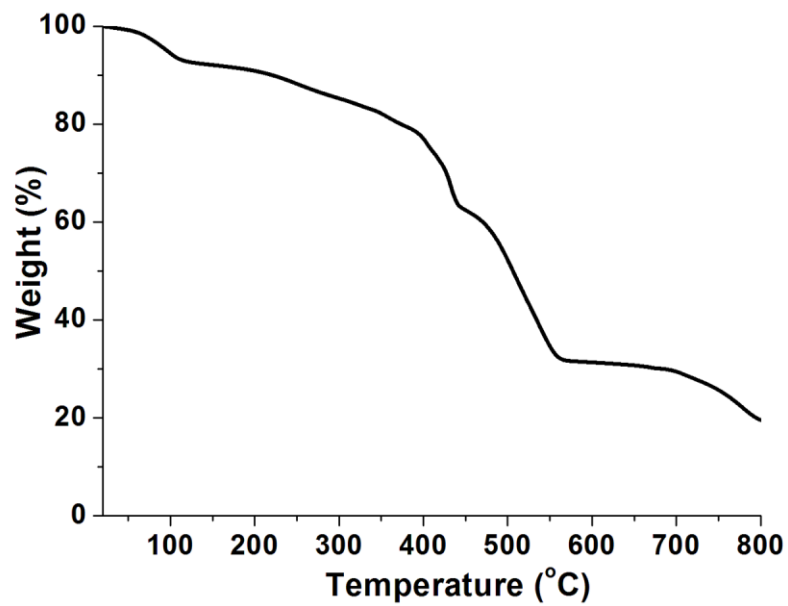

**Figure S2.** TGA curves for AMOF-1.

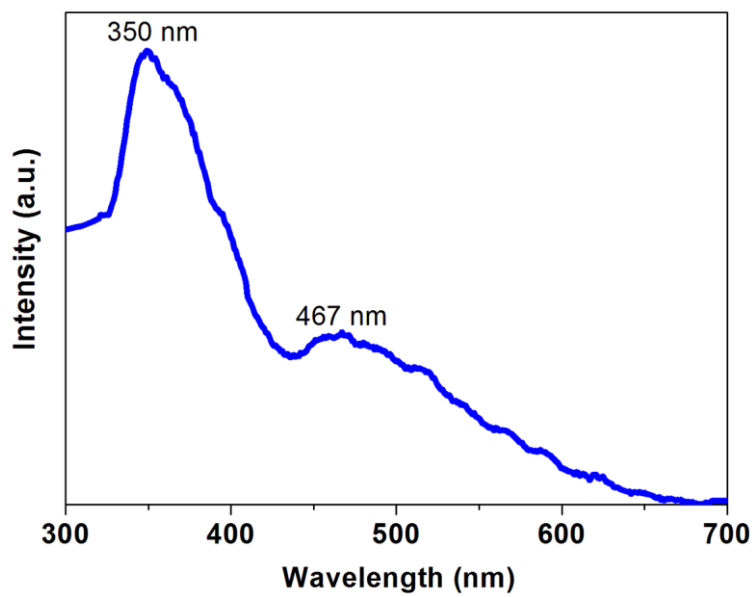

**Figure S3.** Fluorescence spectra of AMOF-1 at room temperature.

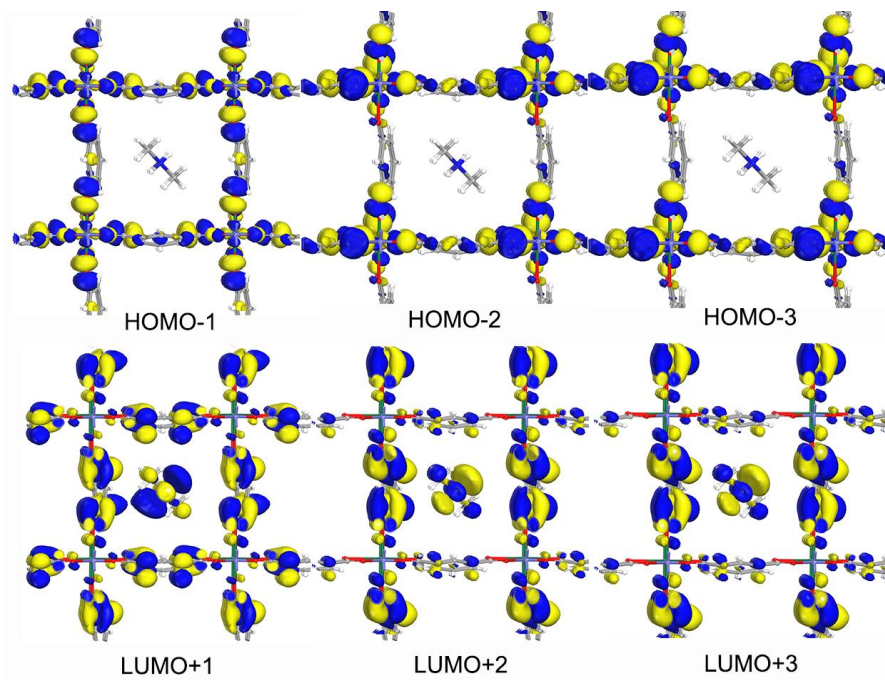

**Figure S4.** The electron-density distribution of various orbitals in AMOF-1.

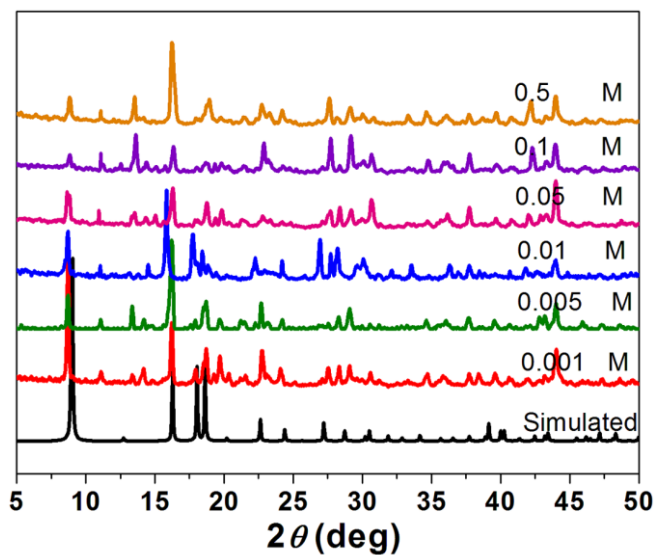

**Figure S5.** PXRD patterns of  $\text{Mn}^{2+}$ @AMOF-1 with different concentrations of  $\text{Mn}^{2+}$  ions.

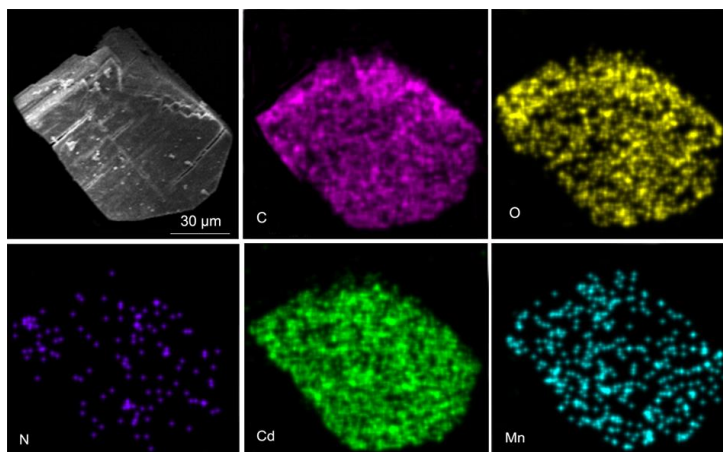

**Figure S6.** Energy-dispersive X-ray spectrometry (EDX) mapping for corresponding elemental distributions in  $\text{Mn}^{2+}$  ions doped AMOF-1.

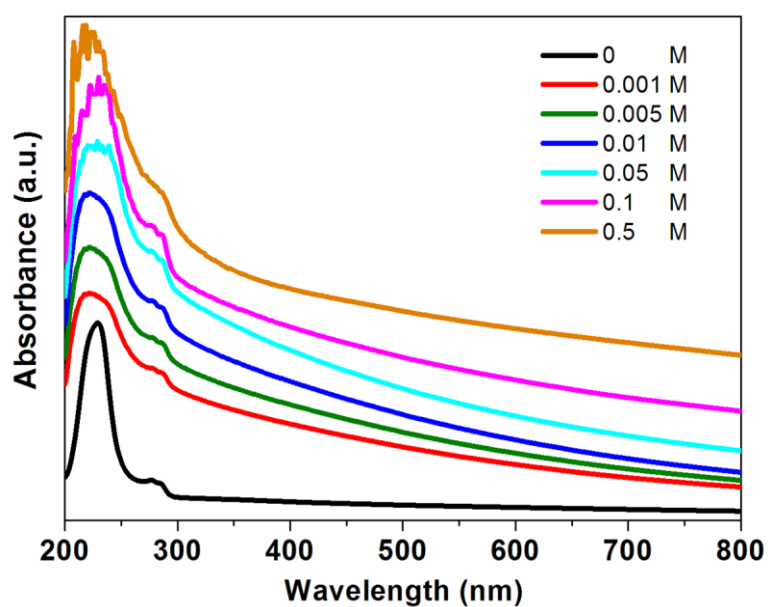

**Figure S7.** UV-visible absorption spectra of  $\text{Mn}^{2+}$ @AMOF-1 with different concentrations of  $\text{Mn}^{2+}$  ions.

**Table S1.** The content of  $\text{Mn}^{2+}$  (wt%) and phosphorescence quantum yields (%) of different  $\text{Mn}^{2+}$  doping AMOF-1 samples.

| Samples                        | 0 M  | 0.001 M | 0.005 M | 0.01 M | 0.05 M | 0.1 M | 0.5 M |
|--------------------------------|------|---------|---------|--------|--------|-------|-------|
| Content of $\text{Mn}^{2+}$    | 0    | 0.28    | 0.36    | 0.85   | 1.43   | 2.11  | 3.87  |
| Phosphorescence quantum yields | 3.68 | 3.01    | 1.56    | 0.17   | 0.58   | 2.86  | 1.35  |

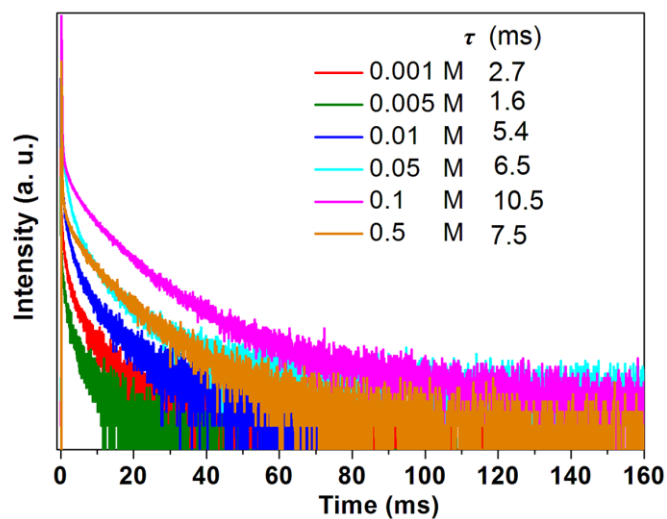

**Figure S8.** Time-resolved phosphorescence decay curves of  $\text{Mn}^{2+}$ @AMOF-1 with different concentration of  $\text{Mn}^{2+}$  ions.

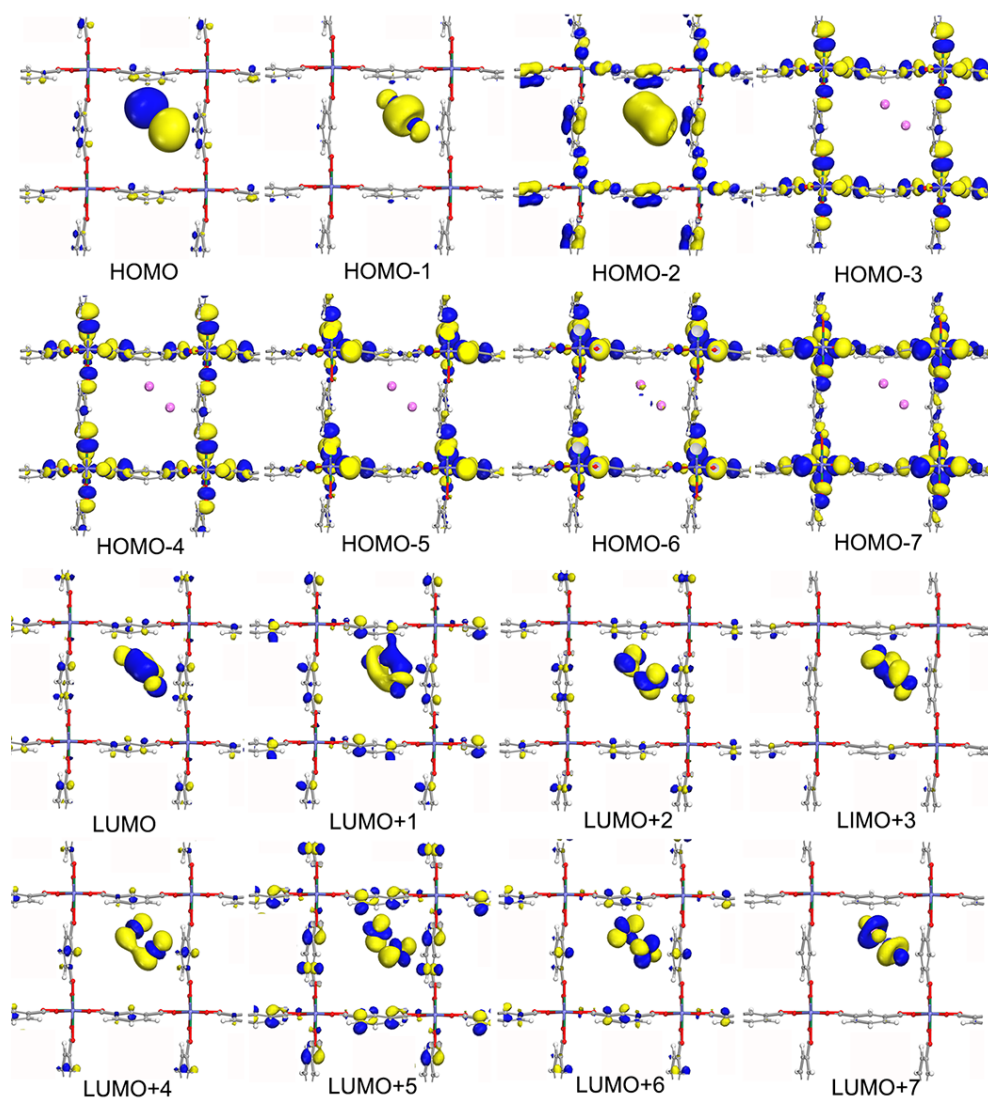

**Figure S9.** The electron-density distributions of various orbitals in  $\text{Mn}^{2+}$ @AMOF-1. (O: red; C: gray; Cd: green; Li: cyan; Mn: pink).

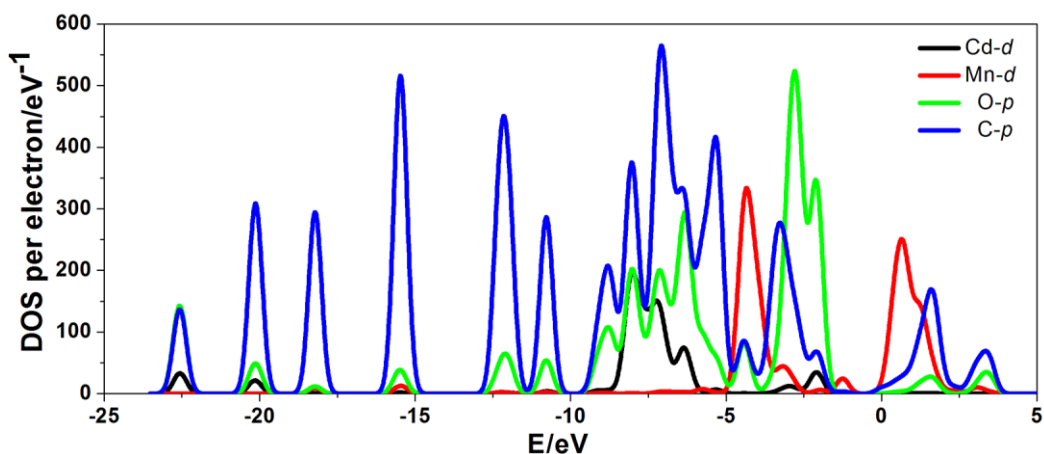

**Figure S10.** The partial electronic density of state (PDOS) for the  $p$ ,  $d$  electrons from C, O, Cd and Mn atoms in  $\text{Mn}^{2+}$ @AMOF-1.

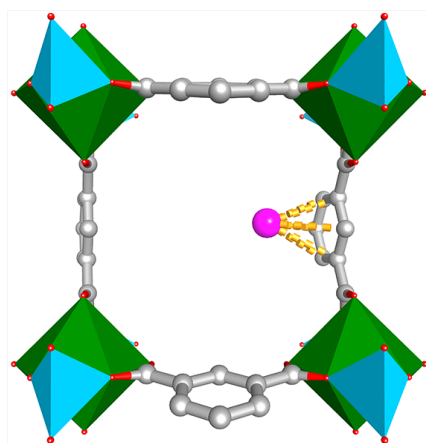

**Figure S11.** The relaxed configuration of  $\text{Mn}^{2+}$ @AMOF-1.

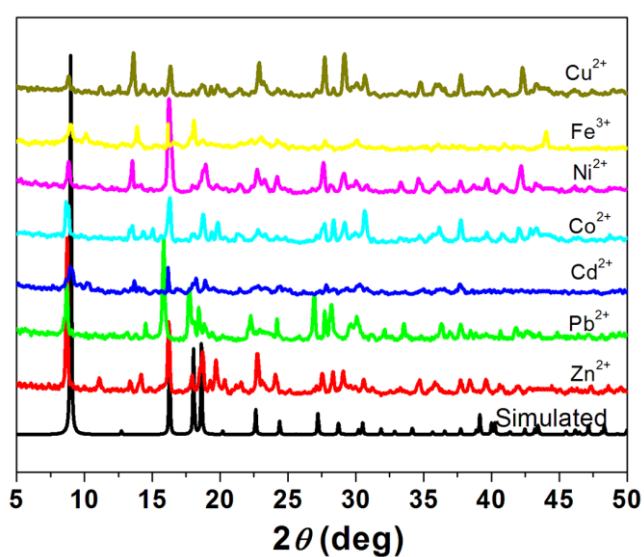

**Figure S12.** PXRD patterns of AMOF-1 incorporating different metal ions.

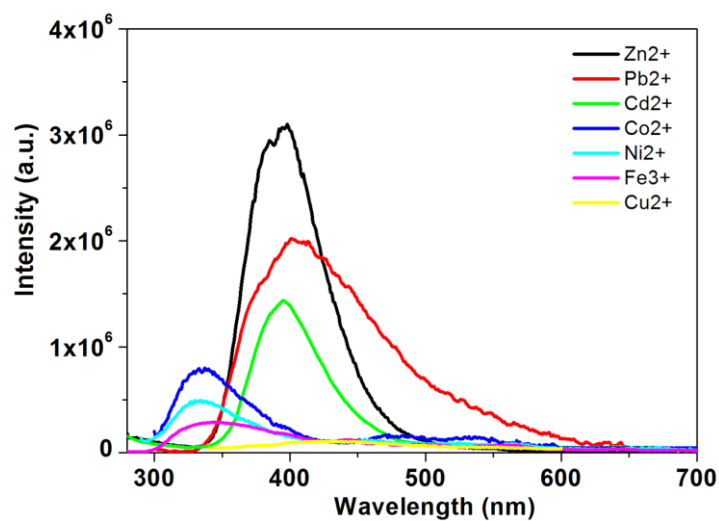

**Figure S13.** LLP spectra of AMOF-1 incorporating different metal ions.

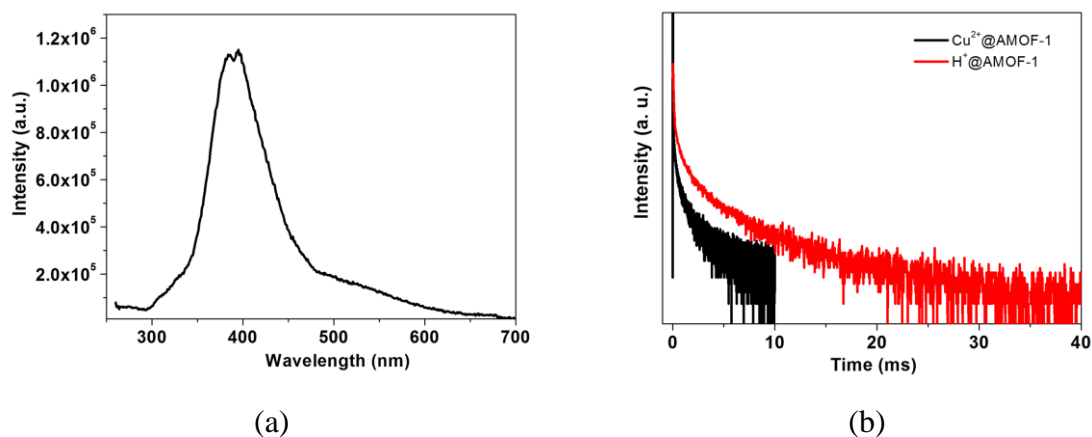

**Figure S14.** (a) LLP spectra of  $\text{H}^+$ @AMOF-1. (b) Time-resolved phosphorescence decay curves of  $\text{Cu}^{2+}$ @AMOF-1 and  $\text{H}^+$ @AMOF-1.

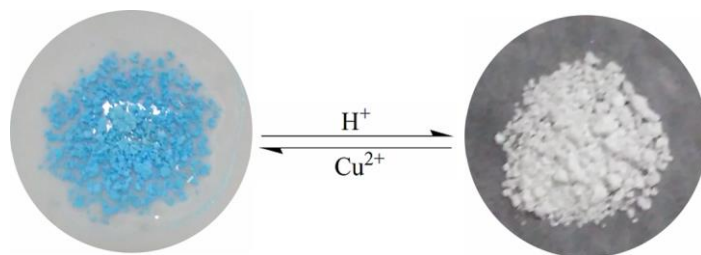

**Figure S15.** Photographs of the reversible changes between  $\text{Cu}^{2+}$ @AMOF-1 and  $\text{H}^+$ @AMOF-1.



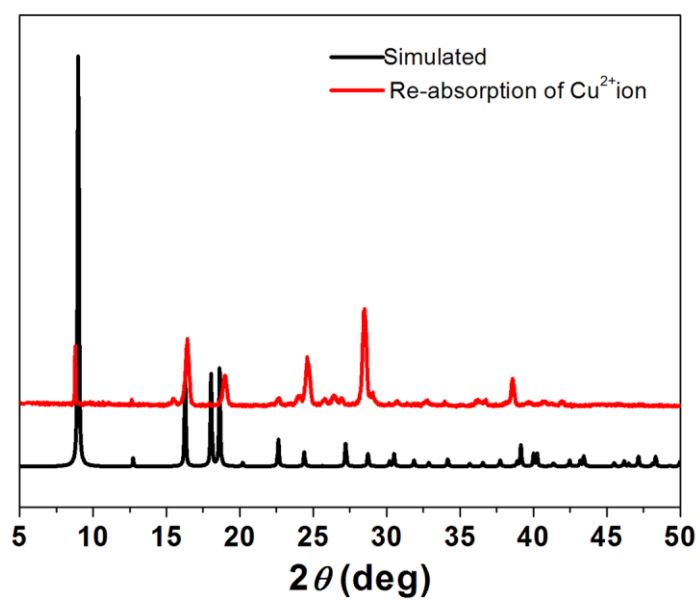

**Figure S16.** PXRD patterns of the final product after re-absorption of  $\text{Cu}^{2+}$  ion.
